# Supplementary material for: Multiple Gestations and Assisted Reproductive Technologies: Qualitative Study of the Discourse of Health Professionals in Spain
Source: MDPI journal article supplement (doi:10.3390/ijerph18116031), 2021-06-03
Supplement: s1 [file s1]

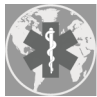

---

**Supplementary Material S1.** Planned Script For The Interview: Midwives

**1. Multiple Current Trends.**

- 1.1 What is your opinion on the number of multiple gestations in recent years?
- 1.2 What do you attribute it to? Assisted Reproductive Technologies? (origin).
- 1.3 What do you think are the circumstances, motivations, or needs to undergo Assisted Reproductive Technologies? (may include haste and publicity).
- 1.4 In your opinion, what are the motivations for delaying motherhood?

**2. Impact.**

- 2.1 What is the impact of multiple gestation on the couple, family, and/or society?
- 2.2 What is the impact of multiple gestation on women's physical and emotional health?

**3. Follow-Up.**

- 3.1 What strengths and weaknesses do you think follow-up to pregnant women from primary care present?
- 3.2 How do you value emotional follow-up for women and couples undergoing Assisted Reproductive Technologies?
- 3.3 If valued negatively not, what do you think this is due to: lack of resources, little involvement of professionals...?
- 3.4 And, regarding this follow-up in the postpartum, in your experience, what would you highlight and why?
- 3.5 What is your opinion regarding stress during this period?

**4. Demands to the Health Administration.**

- 4.1 How is the administration's management of multiple gestation women?
- 4.2 What role are we, professionals, taking on in this regard?
- 4.3 Do you have any requests in this regard?

**5. Suggestions.**

- 5.1 Would you like to add anything else on the subject?
- 5.2 Is there anything I have not asked you? What do you think it is?

---

**Supplementary Material S2.** Planned Script for the Interview: Assisted Reproduction Unit Professionals.

**1. Multiple Current Trends.**

- 1.1 What is your opinion on the number of multiple gestations in recent years?
- 1.2 What do you attribute it to? Assisted Reproductive Technologies? (origin).
- 1.3 How do you address the issue of selective reduction?
- 1.4 What do you think are the circumstances, motivations, or needs to undergo Assisted Reproduction Therapy? (may include haste and publicity).
- 1.5 In your opinion, what are the motivations for delaying motherhood?

**2. Impact.**

- 2.1 What is the impact of treatments on the couple, at the work level and/or at the social level?
- 2.2 What is the impact of multiple gestation on the couple, family, society, and women themselves?

**3. Follow-Up.**

- 3.1 How do you value emotional follow-up for women and couples undergoing Assisted Reproduction Therapy?
- 3.2 If not, what do you think this is due to: lack of resources, little involvement of professionals...?
- 3.3 And, regarding this follow-up in the postpartum, in your experience, what would you highlight and why?
- 3.4 What is your opinion regarding stress during this period?

**4. Demands to the Health Administration.**

- 4.1 How is the administration's management of multiple gestation women?
- 4.2 What role are we, professionals, taking on in this regard?
- 4.3 Do you have any requests in this regard?

**5. Suggestions.**

- 5.1 Would you like to add anything else on the subject?
- 5.2 Is there anything I have not asked you? What do you think it is?
